# Supplementary material
Source: MDPI journal article supplement (https://www.mdpi.com/1996-1073/13/13/3507)
Supplement: s1 [file s1]

## SRI CALCULATION INPUT MATRIX / BASE CASE

| INPUT DATA FOR CURRENT EPC      | USE CASE                                         | BUILDING 1                                       |                            |                                                  | BUILDING 2                                       |                            |                                                  | BUILDING 3                                       |                            |                                                  | BUILDING 4                                       |                            |                                                  | BUILDING 5                                       |                            |                                                  | BUILDING 6                                       |                            |                                                  | BUILDING 7                                       |                            |                                                  | BUILDING 8                                       |                            |                                                  | BUILDING 9                                       |                            |                     |     |
|---------------------------------|--------------------------------------------------|--------------------------------------------------|----------------------------|--------------------------------------------------|--------------------------------------------------|----------------------------|--------------------------------------------------|--------------------------------------------------|----------------------------|--------------------------------------------------|--------------------------------------------------|----------------------------|--------------------------------------------------|--------------------------------------------------|----------------------------|--------------------------------------------------|--------------------------------------------------|----------------------------|--------------------------------------------------|--------------------------------------------------|----------------------------|--------------------------------------------------|--------------------------------------------------|----------------------------|--------------------------------------------------|--------------------------------------------------|----------------------------|---------------------|-----|
|                                 | BUILDING                                         | Residential / Non-Res.                           | Area GFA [m <sup>2</sup> ] | People No.                                       | Residential / Non-Res.                           | Area GFA [m <sup>2</sup> ] | People No.                                       | Residential / Non-Res.                           | Area GFA [m <sup>2</sup> ] | People No.                                       | Residential / Non-Res.                           | Area GFA [m <sup>2</sup> ] | People No.                                       | Residential / Non-Res.                           | Area GFA [m <sup>2</sup> ] | People No.                                       | Residential / Non-Res.                           | Area GFA [m <sup>2</sup> ] | People No.                                       | Residential / Non-Res.                           | Area GFA [m <sup>2</sup> ] | People No.                                       | Residential / Non-Res.                           | Area GFA [m <sup>2</sup> ] | People No.                                       | Residential / Non-Res.                           | Area GFA [m <sup>2</sup> ] | People No.          |     |
|                                 | Key data                                         | Residential                                      | 5768,91                    | 115                                              | Residential                                      | 1008,60                    | 20                                               | Residential                                      | 741,78                     | 15                                               | Residential                                      | 277,44                     | 6                                                | Residential                                      | 496,34                     | 10                                               | Residential                                      | 409,58                     | 8                                                | Residential                                      | 680,39                     | 14                                               | Non-Res.                                         | 4181,308                   | 350                                              | Residential                                      | 4659,00                    | 93                  |     |
|                                 | Description                                      | multi-storey res. building, 1990                 |                            |                                                  | multi-storey res. building, 1990                 |                            |                                                  | multi-storey res. building, pre-1918             |                            |                                                  | multi-storey res. building, post 1945            |                            |                                                  | multi-storey res. building, pre-1918             |                            |                                                  | multi-storey res. building, post 1945            |                            |                                                  | multi-storey res. building, post 1945            |                            |                                                  | office building, 1980s                           |                            |                                                  | multi-storey res. building, 1960s ref.           |                            |                     |     |
|                                 | BUILDING SYSTEMS                                 | Type of system                                   |                            |                                                  | Type of system                                   |                            |                     |     |
|                                 | Heating system                                   | Gas boiler                                       |                            |                                                  | Gas boiler                                       |                            |                     |     |
|                                 | Warm water system                                | Gas boiler                                       |                            |                                                  | Gas boiler                                       |                            |                     |     |
|                                 | Cooling system                                   | n/a                                              |                            |                                                  | n/a                                              |                            |                     |     |
|                                 | Power system                                     | Grid                                             |                            |                                                  | Grid                                             |                            |                     |     |
|                                 | BUILDING ENERGY DEMAND                           | Demand /m <sup>2</sup> [kWh/(m <sup>2</sup> ·a)] | Total Demand [kWh/a]       |                                                  | Demand /m <sup>2</sup> [kWh/(m <sup>2</sup> ·a)] | Total Demand [kWh/a]       |                                                  | Demand /m <sup>2</sup> [kWh/(m <sup>2</sup> ·a)] | Total Demand [kWh/a]       |                                                  | Demand /m <sup>2</sup> [kWh/(m <sup>2</sup> ·a)] | Total Demand [kWh/a]       |                                                  | Demand /m <sup>2</sup> [kWh/(m <sup>2</sup> ·a)] | Total Demand [kWh/a]       |                                                  | Demand /m <sup>2</sup> [kWh/(m <sup>2</sup> ·a)] | Total Demand [kWh/a]       |                                                  | Demand /m <sup>2</sup> [kWh/(m <sup>2</sup> ·a)] | Total Demand [kWh/a]       |                                                  | Demand /m <sup>2</sup> [kWh/(m <sup>2</sup> ·a)] | Total Demand [kWh/a]       |                                                  | Demand /m <sup>2</sup> [kWh/(m <sup>2</sup> ·a)] | Total Demand [kWh/a]       |                     |     |
| Heating energy demand           | 90                                               | 519,202                                          |                            | 80                                               | 80,688                                           |                            | 135                                              | 100,140                                          |                            | 139                                              | 38,564                                           |                            | 135                                              | 67,006                                           |                            | 130                                              | 53,245                                           |                            | 130                                              | 88,451                                           |                            | 30                                               | 125,439                                          |                            | 110                                              | 512,490                                          |                            |                     |     |
| Warm water energy demand        | 13                                               | 74,996                                           |                            | 13                                               | 13,112                                           |                            | 13                                               | 9,643                                            |                            | 13                                               | 3,607                                            |                            | 13                                               | 6,452                                            |                            | 13                                               | 8,845                                            |                            | 13                                               | 8,845                                            |                            | 5                                                | 20,907                                           |                            | 13                                               | 60,567                                           |                            |                     |     |
| Cooling energy demand           | n/a                                              | n/a                                              |                            | 30                                               | n/a                                              |                            | n/a                                              | n/a                                              |                            |                     |     |
| Technical systems energy demand | 5                                                | 28,845                                           |                            | 5                                                | 5,043                                            |                            | 5                                                | 3,709                                            |                            | 5                                                | 1,387                                            |                            | 5                                                | 2,482                                            |                            | 3                                                | 1,229                                            |                            | 5                                                | 3,402                                            |                            | 5                                                | 20,907                                           |                            | 5                                                | 23,295                                           |                            |                     |     |
| Power demand                    | 20                                               | 115,378                                          |                            | 20                                               | 10,172                                           |                            | 20                                               | 14,836                                           |                            | 20                                               | 5,349                                            |                            | 20                                               | 9,927                                            |                            | 20                                               | 8,192                                            |                            | 20                                               | 13,608                                           |                            | 30                                               | 125,439                                          |                            | 20                                               | 93,180                                           |                            |                     |     |
| ENERGY DEMAND / SOURCE          | Source /m <sup>2</sup> [kWh/(m <sup>2</sup> ·a)] | BED [kWh/a]                                      |                            | Source /m <sup>2</sup> [kWh/(m <sup>2</sup> ·a)] | BED [kWh/a]                                      |                            | Source /m <sup>2</sup> [kWh/(m <sup>2</sup> ·a)] | BED [kWh/a]                                      |                            | Source /m <sup>2</sup> [kWh/(m <sup>2</sup> ·a)] | BED [kWh/a]                                      |                            | Source /m <sup>2</sup> [kWh/(m <sup>2</sup> ·a)] | BED [kWh/a]                                      |                            | Source /m <sup>2</sup> [kWh/(m <sup>2</sup> ·a)] | BED [kWh/a]                                      |                            | Source /m <sup>2</sup> [kWh/(m <sup>2</sup> ·a)] | BED [kWh/a]                                      |                            | Source /m <sup>2</sup> [kWh/(m <sup>2</sup> ·a)] | BED [kWh/a]                                      |                            | Source /m <sup>2</sup> [kWh/(m <sup>2</sup> ·a)] | BED [kWh/a]                                      |                            |                     |     |
| Electrical grid energy demand   | 25                                               | 144,223                                          |                            | 25                                               | 25,215                                           |                            | 25                                               | 18,545                                           |                            | 25                                               | 6,936                                            |                            | 25                                               | 12,409                                           |                            | 23                                               | 9,420                                            |                            | 25                                               | 17,011                                           |                            | 35                                               | 146,341                                          |                            | 25                                               | 116,475                                          |                            |                     |     |
| Thermal grid energy demand      | 103                                              | 594,197                                          |                            | 93                                               | 93,799                                           |                            | 148                                              | 109,783                                          |                            | 152                                              | 42,171                                           |                            | 148                                              | 73,458                                           |                            | 143                                              | 58,570                                           |                            | 143                                              | 97,296                                           |                            | 65                                               | 271,785                                          |                            | 123                                              | 573,057                                          |                            |                     |     |
| Gas grid energy demand          | n/a                                              | n/a                                              |                            |                     |     |
| Other (not grid connected)      | n/a                                              | n/a                                              |                            |                     |     |
| INPUT DATA FOR SRI              | STORAGE TYPE                                     | Capacity                                         | Efficiency                 | Loss                                             | Capacity                                         | Efficiency                 | Loss                |     |
|                                 |                                                  | SC [kWh]                                         | η <sub>SC</sub> [%]        | ζ <sub>SC</sub> [%]                              | SC [kWh]                                         | η <sub>SC</sub> [%]        | ζ <sub>SC</sub> [%]                              | SC [kWh]                                         | η <sub>SC</sub> [%]        | ζ <sub>SC</sub> [%]                              | SC [kWh]                                         | η <sub>SC</sub> [%]        | ζ <sub>SC</sub> [%]                              | SC [kWh]                                         | η <sub>SC</sub> [%]        | ζ <sub>SC</sub> [%]                              | SC [kWh]                                         | η <sub>SC</sub> [%]        | ζ <sub>SC</sub> [%]                              | SC [kWh]                                         | η <sub>SC</sub> [%]        | ζ <sub>SC</sub> [%]                              | SC [kWh]                                         | η <sub>SC</sub> [%]        | ζ <sub>SC</sub> [%]                              | SC [kWh]                                         | η <sub>SC</sub> [%]        | ζ <sub>SC</sub> [%] |     |
|                                 | Storage electrical                               | 0                                                | 93                         | 93                                               | 0,1                                              | 0                          | 93                                               | 93                                               | 0,1                        | 0                                                | 93                                               | 93                         | 0,1                                              | 0                                                | 93                         | 93                                               | 0,1                                              | 0                          | 93                                               | 93                                               | 0,1                        | 0                                                | 93                                               | 93                         | 0,1                                              | 0                                                | 93                         | 93                  | 0,1 |
|                                 | Storage thermal                                  | 1,462                                            | 90                         | 90                                               | 1                                                | 264                        | 90                                               | 90                                               | 1                          | 183                                              | 90                                               | 90                         | 1                                                | 61                                               | 90                         | 90                                               | 1                                                | 162                        | 90                                               | 90                                               | 1                          | 102                                              | 90                                               | 90                         | 1                                                | 183                                              | 90                         | 90                  | 1   |
|                                 | Storage gas                                      | n/a                                              | n/a                        | n/a                                              | n/a                                              | n/a                        | n/a                 | n/a |
|                                 | STORAGE ACTIVITY                                 | Activity coefficient                             | Time [d]                   |                                                  | Activity coefficient                             | Time [d]                   |                     |     |
|                                 |                                                  | AC [n/a, 0,1,2]                                  | [d]                        |                     |     |
|                                 | Storage grid type electrical                     | 0                                                | 1                          |                                                  | 0                                                | 1                          |                                                  | 0                                                | 1                          |                                                  | 0                                                | 1                          |                                                  | 0                                                | 1                          |                                                  | 0                                                | 1                          |                                                  | 0                                                | 1                          |                                                  | 0                                                | 1                          |                                                  | 0                                                | 1                          |                     |     |
|                                 | Storage grid type thermal                        | n/a                                              | 1                          |                                                  | n/a                                              | 1                          |                     |     |
|                                 | Storage grid type gas                            | 0                                                | 1                          |                                                  | 0                                                | 1                          |                                                  | 0                                                | 1                          |                                                  | 0                                                | 1                          |                                                  | 0                                                | 1                          |                                                  | 0                                                | 1                          |                                                  | 0                                                | 1                          |                                                  | 0                                                | 1                          |                                                  | 0                                                | 1                          |                     |     |

## SRI CALCULATION RESULTS

[illegible]

SRI CALCULATION INPUT MATRIX / SCENARIO 1

| INPUT DATA FOR CURRENT EPC      | USE CASE                     | BUILDING 1                                      |                                                 |                          | BUILDING 2                                      |                                                 |                      | BUILDING 3                                      |                                                 |                      | BUILDING 4                                      |                                                 |                      | BUILDING 5                                      |                                                 |                          | BUILDING 6                                      |                                                 |                      | BUILDING 7                                      |                                                 |                      | BUILDING 8                                      |                                                 |                      | BUILDING 9                             |         |    |
|---------------------------------|------------------------------|-------------------------------------------------|-------------------------------------------------|--------------------------|-------------------------------------------------|-------------------------------------------------|----------------------|-------------------------------------------------|-------------------------------------------------|----------------------|-------------------------------------------------|-------------------------------------------------|----------------------|-------------------------------------------------|-------------------------------------------------|--------------------------|-------------------------------------------------|-------------------------------------------------|----------------------|-------------------------------------------------|-------------------------------------------------|----------------------|-------------------------------------------------|-------------------------------------------------|----------------------|----------------------------------------|---------|----|
|                                 | BUILDING                     | Residential / Non-Res.                          | Area GFA [m <sup>2</sup> ]                      | People No.               | Residential / Non-Res.                          | Area GFA [m <sup>2</sup> ]                      | People No.           | Residential / Non-Res.                          | Area GFA [m <sup>2</sup> ]                      | People No.           | Residential / Non-Res.                          | Area GFA [m <sup>2</sup> ]                      | People No.           | Residential / Non-Res.                          | Area GFA [m <sup>2</sup> ]                      | People No.               | Residential / Non-Res.                          | Area GFA [m <sup>2</sup> ]                      | People No.           | Residential / Non-Res.                          | Area GFA [m <sup>2</sup> ]                      | People No.           | Residential / Non-Res.                          | Area GFA [m <sup>2</sup> ]                      | People No.           |                                        |         |    |
|                                 | Key data                     | Residential                                     | 5768,91                                         | 115                      | Residential                                     | 1008,60                                         | 20                   | Residential                                     | 741,78                                          | 15                   | Residential                                     | 277,44                                          | 6                    | Residential                                     | 496,34                                          | 10                       | Residential                                     | 409,58                                          | 8                    | Residential                                     | 680,39                                          | 14                   | Non-Res.                                        | 4181,308                                        | 350                  | Residential                            | 4659,00 | 93 |
|                                 | Description                  | multi-storey res. building, 1990                |                                                 |                          | multi-storey res. building, 1990                |                                                 |                      | multi-storey res. building, pre-1918            |                                                 |                      | multi-storey res. building, post 1945           |                                                 |                      | multi-storey res. building, pre-1918            |                                                 |                          | multi-storey res. building, post 1945           |                                                 |                      | multi-storey res. building, post 1945           |                                                 |                      | office building, 1980s                          |                                                 |                      | multi-storey res. building, 1960s ref. |         |    |
|                                 | BUILDING SYSTEMS             | Type of system                                  |                                                 |                          | Type of system                                  |                                                 |                      | Type of system                                  |                                                 |                      | Type of system                                  |                                                 |                      | Type of system                                  |                                                 |                          | Type of system                                  |                                                 |                      | Type of system                                  |                                                 |                      | Type of system                                  |                                                 |                      |                                        |         |    |
|                                 | Heating system               | Gas boiler                                      |                                                 |                          | Gas boiler                                      |                                                 |                      | Gas boiler                                      |                                                 |                      | Gas boiler                                      |                                                 |                      | Gas boiler                                      |                                                 |                          | Gas boiler                                      |                                                 |                      | Gas boiler                                      |                                                 |                      | Gas boiler                                      |                                                 |                      |                                        |         |    |
|                                 | Warm water system            | Gas boiler                                      |                                                 |                          | Gas boiler                                      |                                                 |                      | Gas boiler                                      |                                                 |                      | Gas boiler                                      |                                                 |                      | Gas boiler                                      |                                                 |                          | Gas boiler                                      |                                                 |                      | Gas boiler                                      |                                                 |                      | Gas boiler                                      |                                                 |                      |                                        |         |    |
|                                 | Cooling system               | n/a                                             |                                                 |                          | n/a                                             |                                                 |                      | n/a                                             |                                                 |                      | n/a                                             |                                                 |                      | n/a                                             |                                                 |                          | n/a                                             |                                                 |                      | n/a                                             |                                                 |                      | n/a                                             |                                                 |                      |                                        |         |    |
|                                 | Power system                 | Grid                                            |                                                 |                          | Grid                                            |                                                 |                      | Grid                                            |                                                 |                      | Grid                                            |                                                 |                      | Grid                                            |                                                 |                          | Grid                                            |                                                 |                      | Grid                                            |                                                 |                      | Grid                                            |                                                 |                      |                                        |         |    |
|                                 | RESULTS FROM CURRENT EPC     | BUILDING ENERGY DEMAND                          | Demand /m <sup>2</sup> [kWh/(m <sup>2</sup> a)] | Total Demand [kWh/a]     |                                                 | Demand /m <sup>2</sup> [kWh/(m <sup>2</sup> a)] | Total Demand [kWh/a] |                                                 | Demand /m <sup>2</sup> [kWh/(m <sup>2</sup> a)] | Total Demand [kWh/a] |                                                 | Demand /m <sup>2</sup> [kWh/(m <sup>2</sup> a)] | Total Demand [kWh/a] |                                                 | Demand /m <sup>2</sup> [kWh/(m <sup>2</sup> a)] | Total Demand [kWh/a]     |                                                 | Demand /m <sup>2</sup> [kWh/(m <sup>2</sup> a)] | Total Demand [kWh/a] |                                                 | Demand /m <sup>2</sup> [kWh/(m <sup>2</sup> a)] | Total Demand [kWh/a] |                                                 | Demand /m <sup>2</sup> [kWh/(m <sup>2</sup> a)] | Total Demand [kWh/a] |                                        |         |    |
| Heating energy demand           |                              | 45                                              | 259.601                                         |                          | 40                                              | 40.344                                          |                      | 68                                              | 50.070                                          |                      | 70                                              | 19.282                                          |                      | 68                                              | 33.503                                          |                          | 65                                              | 26.623                                          |                      | 65                                              | 44.226                                          |                      | 15                                              | 62.720                                          |                      |                                        |         |    |
| Warm water energy demand        |                              | 13                                              | 74.996                                          |                          | 13                                              | 13.112                                          |                      | 13                                              | 9.643                                           |                      | 13                                              | 3.607                                           |                      | 13                                              | 6.452                                           |                          | 13                                              | 5.325                                           |                      | 13                                              | 8.845                                           |                      | 5                                               | 20.907                                          |                      |                                        |         |    |
| Cooling energy demand           |                              | n/a                                             | n/a                                             |                          | n/a                                             | n/a                                             |                      | n/a                                             | n/a                                             |                      | n/a                                             | n/a                                             |                      | n/a                                             | n/a                                             |                          | n/a                                             | n/a                                             |                      | n/a                                             | n/a                                             |                      | 30                                              | n/a                                             |                      |                                        |         |    |
| Technical systems energy demand |                              | 5                                               | 28.845                                          |                          | 5                                               | 5.043                                           |                      | 5                                               | 3.709                                           |                      | 5                                               | 1.387                                           |                      | 5                                               | 2.482                                           |                          | 3                                               | 1.229                                           |                      | 5                                               | 3.402                                           |                      | 5                                               | 20.907                                          |                      |                                        |         |    |
| Power demand                    |                              | 20                                              | 115.378                                         |                          | 20                                              | 20.172                                          |                      | 20                                              | 14.836                                          |                      | 20                                              | 5.549                                           |                      | 20                                              | 9.927                                           |                          | 20                                              | 8.192                                           |                      | 20                                              | 13.608                                          |                      | 30                                              | 125.439                                         |                      |                                        |         |    |
| ENERGY DEMAND / SOURCE          |                              | Source /m <sup>2</sup> [kWh/(m <sup>2</sup> a)] | BED [kWh/a]                                     |                          | Source /m <sup>2</sup> [kWh/(m <sup>2</sup> a)] | BED [kWh/a]                                     |                      | Source /m <sup>2</sup> [kWh/(m <sup>2</sup> a)] | BED [kWh/a]                                     |                      | Source /m <sup>2</sup> [kWh/(m <sup>2</sup> a)] | BED [kWh/a]                                     |                      | Source /m <sup>2</sup> [kWh/(m <sup>2</sup> a)] | BED [kWh/a]                                     |                          | Source /m <sup>2</sup> [kWh/(m <sup>2</sup> a)] | BED [kWh/a]                                     |                      | Source /m <sup>2</sup> [kWh/(m <sup>2</sup> a)] | BED [kWh/a]                                     |                      | Source /m <sup>2</sup> [kWh/(m <sup>2</sup> a)] | BED [kWh/a]                                     |                      |                                        |         |    |
| Electrical grid energy demand   |                              | 25                                              | 144.223                                         |                          | 25                                              | 25.215                                          |                      | 25                                              | 18.545                                          |                      | 25                                              | 6.936                                           |                      | 25                                              | 12.409                                          |                          | 23                                              | 9.420                                           |                      | 25                                              | 17.010                                          |                      | 35                                              | 146.346                                         |                      |                                        |         |    |
| Thermal grid energy demand      |                              | 58                                              | 334.597                                         |                          | 53                                              | 53.456                                          |                      | 81                                              | 59.713                                          |                      | 83                                              | 22.889                                          |                      | 81                                              | 39.955                                          |                          | 78                                              | 31.947                                          |                      | 78                                              | 53.071                                          |                      | 50                                              | 209.065                                         |                      |                                        |         |    |
| Gas grid energy demand          |                              | n/a                                             | n/a                                             |                          | n/a                                             | n/a                                             |                      | n/a                                             | n/a                                             |                      | n/a                                             | n/a                                             |                      | n/a                                             | n/a                                             |                          | n/a                                             | n/a                                             |                      | n/a                                             | n/a                                             |                      | n/a                                             | n/a                                             |                      |                                        |         |    |
| INPUT DATA FOR SRI              | Other (not grid connected)   | n/a                                             | n/a                                             |                          | n/a                                             | n/a                                             |                      | n/a                                             | n/a                                             |                      | n/a                                             | n/a                                             |                      | n/a                                             | n/a                                             |                          | n/a                                             | n/a                                             |                      | n/a                                             | n/a                                             |                      | n/a                                             | n/a                                             |                      |                                        |         |    |
|                                 | STORAGE TYPE                 | Capacity                                        | Efficiency                                      | Loss                     | Capacity                                        | Efficiency                                      | Loss                 | Capacity                                        | Efficiency                                      | Loss                 | Capacity                                        | Efficiency                                      | Loss                 | Capacity                                        | Efficiency                                      | Loss                     | Capacity                                        | Efficiency                                      | Loss                 | Capacity                                        | Efficiency                                      | Loss                 | Capacity                                        | Efficiency                                      | Loss                 |                                        |         |    |
|                                 | Storage electrical           | SC [kWh]                                        | η <sub>SC</sub> [%]                             | η <sub>SC,loss</sub> [%] | ζ <sub>SC</sub> [%]                             | SC [kWh]                                        | η <sub>SC</sub> [%]  | η <sub>SC,loss</sub> [%]                        | ζ <sub>SC</sub> [%]                             | SC [kWh]             | η <sub>SC</sub> [%]                             | η <sub>SC,loss</sub> [%]                        | ζ <sub>SC</sub> [%]  | SC [kWh]                                        | η <sub>SC</sub> [%]                             | η <sub>SC,loss</sub> [%] | ζ <sub>SC</sub> [%]                             | SC [kWh]                                        | η <sub>SC</sub> [%]  | η <sub>SC,loss</sub> [%]                        | ζ <sub>SC</sub> [%]                             | SC [kWh]             | η <sub>SC</sub> [%]                             | η <sub>SC,loss</sub> [%]                        |                      |                                        |         |    |
|                                 | Storage thermal              | 395                                             | 93                                              | 93                       | 0,1                                             | 69                                              | 93                   | 93                                              | 0,1                                             | 51                   | 93                                              | 93                                              | 0,1                  | 19                                              | 93                                              | 93                       | 0,1                                             | 26                                              | 93                   | 93                                              | 0,1                                             | 47                   | 93                                              | 93                                              | 0,1                  |                                        |         |    |
|                                 | Storage gas                  | 1.462                                           | 90                                              | 90                       | 1                                               | 264                                             | 90                   | 90                                              | 1                                               | 183                  | 90                                              | 90                                              | 1                    | 61                                              | 90                                              | 90                       | 1                                               | 162                                             | 90                   | 90                                              | 1                                               | 102                  | 90                                              | 90                                              | 1                    |                                        |         |    |
|                                 | Storage grid type electrical | n/a                                             | n/a                                             | n/a                      | n/a                                             | n/a                                             | n/a                  | n/a                                             | n/a                                             | n/a                  | n/a                                             | n/a                                             | n/a                  | n/a                                             | n/a                                             | n/a                      | n/a                                             | n/a                                             | n/a                  | n/a                                             | n/a                                             | n/a                  | n/a                                             | n/a                                             | n/a                  |                                        |         |    |
|                                 | STORAGE ACTIVITY             | Activity coefficient                            | Time                                            |                          | Activity coefficient                            | Time                                            |                      | Activity coefficient                            | Time                                            |                      | Activity coefficient                            | Time                                            |                      | Activity coefficient                            | Time                                            |                          | Activity coefficient                            | Time                                            |                      | Activity coefficient                            | Time                                            |                      | Activity coefficient                            | Time                                            |                      |                                        |         |    |
|                                 | Storage grid type electrical | AC [n/a, 0,1,2]                                 | [d]                                             |                          | AC [n/a, 0,1,2]                                 | [d]                                             |                      | AC [n/a, 0,1,2]                                 | [d]                                             |                      | AC [n/a, 0,1,2]                                 | [d]                                             |                      | AC [n/a, 0,1,2]                                 | [d]                                             |                          | AC [n/a, 0,1,2]                                 | [d]                                             |                      | AC [n/a, 0,1,2]                                 | [d]                                             |                      | AC [n/a, 0,1,2]                                 | [d]                                             |                      |                                        |         |    |
|                                 | Storage grid type thermal    | 2                                               | 1                                               |                          | 2                                               | 1                                               |                      | 2                                               | 1                                               |                      | 2                                               | 1                                               |                      | 2                                               | 1                                               |                          | 2                                               | 1                                               |                      | 2                                               | 1                                               |                      | 2                                               | 1                                               |                      |                                        |         |    |
|                                 | Storage grid type gas        | 1                                               | 1                                               |                          | 1                                               | 1                                               |                      | 1                                               | 1                                               |                      | 1                                               | 1                                               |                      | 1                                               | 1                                               |                          | 1                                               | 1                                               |                      | 1                                               | 1                                               |                      | 1                                               | 1                                               |                      |                                        |         |    |
| RESULTS FROM SRI                | SRI electrical               | 0,61                                            |                                                 |                          | 0,61                                            |                                                 |                      | 0,61                                            |                                                 |                      | 0,61                                            |                                                 |                      | 0,63                                            |                                                 |                          | 0,61                                            |                                                 |                      | 0,61                                            |                                                 |                      | 0,61                                            |                                                 |                      |                                        |         |    |
|                                 | SRI thermal                  | 0,25                                            |                                                 |                          | 0,40                                            |                                                 |                      | 0,07                                            |                                                 |                      | 0,04                                            |                                                 |                      | 0,17                                            |                                                 |                          | 0,07                                            |                                                 |                      | 0,10                                            |                                                 |                      | 0,38                                            |                                                 |                      |                                        |         |    |
|                                 | SRI gas                      | n/a                                             |                                                 |                          | n/a                                             |                                                 |                      | n/a                                             |                                                 |                      | n/a                                             |                                                 |                      | n/a                                             |                                                 |                          | n/a                                             |                                                 |                      | n/a                                             |                                                 |                      | n/a                                             |                                                 |                      |                                        |         |    |
|                                 |                              |                                                 |                                                 |                          |                                                 |                                                 |                      |                                                 |                                                 |                      |                                                 |                                                 |                      |                                                 |                                                 |                          |                                                 |                                                 |                      |                                                 |                                                 |                      |                                                 |                                                 |                      |                                        |         |    |

SRI CALCULATION RESULTS

| INPUT DATA<br>FOR SRI | USE CASE                     | BUILDING 1                              | BUILDING 2                              | BUILDING 3                              | BUILDING 4                              | BUILDING 5                              | BUILDING 6                              | BUILDING 7                              | BUILDING 8                              | BUILDING 9                              |
|-----------------------|------------------------------|-----------------------------------------|-----------------------------------------|-----------------------------------------|-----------------------------------------|-----------------------------------------|-----------------------------------------|-----------------------------------------|-----------------------------------------|-----------------------------------------|
|                       | STORAGE ACTIVITY             | Activity coefficient<br>AC [n/a, 0,1,2] |
|                       | Storage grid type electrical | 2                                       | 2                                       | 2                                       | 2                                       | 2                                       | 2                                       | 2                                       | 2                                       | 2                                       |
|                       | Storage grid type thermal    | 1                                       | 1                                       | 1                                       | 1                                       | 1                                       | 1                                       | 1                                       | 1                                       | 1                                       |
|                       | Storage grid type gas        | n/a                                     |
| RESULTS FROM<br>SRI   | SRI / GRID TYPE              | SRI / grid type<br>[0-2]                |
|                       | SRI electrical               | 0,61                                    | 0,61                                    | 0,62                                    | 0,61                                    | 0,61                                    | 0,63                                    | 0,63                                    | 0,61                                    | 0,61                                    |
|                       | SRI thermal                  | 0,25                                    | 0,40                                    | 0,07                                    | 0,04                                    | 0,17                                    | 0,07                                    | 0,10                                    | 0,38                                    | 0,13                                    |
|                       | SRI gas                      | n/a                                     |

## SRI CALCULATION INPUT MATRIX / SCENARIO 2

| INPUT DATA FOR CURRENT EPC   | USE CASE                        | BUILDING 1                                      |                            |                                                 | BUILDING 2                       |                                                 |                      | BUILDING 3                                      |                            |                                                 | BUILDING 4                            |                                                 |                      | BUILDING 5                                      |                            |                                                 | BUILDING 6                            |                                                 |                      | BUILDING 7                                      |                            |                                                 | BUILDING 8             |                                                 |                      | BUILDING 9                                      |                            |                    |                      |     |
|------------------------------|---------------------------------|-------------------------------------------------|----------------------------|-------------------------------------------------|----------------------------------|-------------------------------------------------|----------------------|-------------------------------------------------|----------------------------|-------------------------------------------------|---------------------------------------|-------------------------------------------------|----------------------|-------------------------------------------------|----------------------------|-------------------------------------------------|---------------------------------------|-------------------------------------------------|----------------------|-------------------------------------------------|----------------------------|-------------------------------------------------|------------------------|-------------------------------------------------|----------------------|-------------------------------------------------|----------------------------|--------------------|----------------------|-----|
|                              | BUILDING                        | Residential / Non-Res.                          | Area GFA [m <sup>2</sup> ] | People No.                                      | Residential / Non-Res.           | Area GFA [m <sup>2</sup> ]                      | People No.           | Residential / Non-Res.                          | Area GFA [m <sup>2</sup> ] | People No.                                      | Residential / Non-Res.                | Area GFA [m <sup>2</sup> ]                      | People No.           | Residential / Non-Res.                          | Area GFA [m <sup>2</sup> ] | People No.                                      | Residential / Non-Res.                | Area GFA [m <sup>2</sup> ]                      | People No.           | Residential / Non-Res.                          | Area GFA [m <sup>2</sup> ] | People No.                                      | Residential / Non-Res. | Area GFA [m <sup>2</sup> ]                      | People No.           | Residential / Non-Res.                          | Area GFA [m <sup>2</sup> ] | People No.         |                      |     |
|                              | Key data                        | Residential                                     | 5768,91                    | 115                                             | Residential                      | 1008,60                                         | 20                   | Residential                                     | 741,78                     | 15                                              | Residential                           | 277,44                                          | 6                    | Residential                                     | 496,34                     | 10                                              | Residential                           | 409,58                                          | 8                    | Residential                                     | 680,39                     | 14                                              | Non-Res.               | 4181,308                                        | 350                  | Residential                                     | 4559,00                    | 93                 |                      |     |
|                              | Description                     | multi-storey res. building, 1990                |                            |                                                 | multi-storey res. building, 1990 |                                                 |                      | multi-storey res. building, pre-1918            |                            |                                                 | multi-storey res. building, post 1945 |                                                 |                      | multi-storey res. building, pre-1918            |                            |                                                 | multi-storey res. building, post 1945 |                                                 |                      | multi-storey res. building, post 1945           |                            |                                                 | office building; 1980s |                                                 |                      | multi-storey res. building, 1960s ref.          |                            |                    |                      |     |
|                              | BUILDING SYSTEMS                | Type of system                                  |                            |                                                 | Type of system                   |                                                 |                      | Type of system                                  |                            |                                                 | Type of system                        |                                                 |                      | Type of system                                  |                            |                                                 | Type of system                        |                                                 |                      | Type of system                                  |                            |                                                 | Type of system         |                                                 |                      | Type of system                                  |                            |                    |                      |     |
|                              | Heating system                  | Gas boiler                                      |                            |                                                 | Gas boiler                       |                                                 |                      | Gas boiler                                      |                            |                                                 | Gas boiler                            |                                                 |                      | Gas boiler                                      |                            |                                                 | Gas boiler                            |                                                 |                      | Gas boiler                                      |                            |                                                 | Gas boiler             |                                                 |                      | Gas boiler                                      |                            |                    |                      |     |
| Warm water system            | Gas boiler                      |                                                 |                            | Gas boiler                                      |                                  |                                                 | Gas boiler           |                                                 |                            | Gas boiler                                      |                                       |                                                 | Gas boiler           |                                                 |                            | Gas boiler                                      |                                       |                                                 | Gas boiler           |                                                 |                            | Gas boiler                                      |                        |                                                 | Gas boiler           |                                                 |                            |                    |                      |     |
| Cooling system               | n/a                             |                                                 |                            | n/a                                             |                                  |                                                 | n/a                  |                                                 |                            | n/a                                             |                                       |                                                 | n/a                  |                                                 |                            | n/a                                             |                                       |                                                 | n/a                  |                                                 |                            | n/a                                             |                        |                                                 | n/a                  |                                                 |                            |                    |                      |     |
| Power system                 | Grid                            |                                                 |                            | Grid                                            |                                  |                                                 | Grid                 |                                                 |                            | Grid                                            |                                       |                                                 | Grid                 |                                                 |                            | Grid                                            |                                       |                                                 | Grid                 |                                                 |                            | Grid                                            |                        |                                                 | Grid                 |                                                 |                            |                    |                      |     |
| RESULTS FROM CURRENT EPC     | BUILDING ENERGY DEMAND          | Demand /m <sup>2</sup> [kWh/(m <sup>2</sup> a)] | Total Demand [kWh/a]       | Demand /m <sup>2</sup> [kWh/(m <sup>2</sup> a)] | Total Demand [kWh/a]             | Demand /m <sup>2</sup> [kWh/(m <sup>2</sup> a)] | Total Demand [kWh/a] | Demand /m <sup>2</sup> [kWh/(m <sup>2</sup> a)] | Total Demand [kWh/a]       | Demand /m <sup>2</sup> [kWh/(m <sup>2</sup> a)] | Total Demand [kWh/a]                  | Demand /m <sup>2</sup> [kWh/(m <sup>2</sup> a)] | Total Demand [kWh/a] | Demand /m <sup>2</sup> [kWh/(m <sup>2</sup> a)] | Total Demand [kWh/a]       | Demand /m <sup>2</sup> [kWh/(m <sup>2</sup> a)] | Total Demand [kWh/a]                  | Demand /m <sup>2</sup> [kWh/(m <sup>2</sup> a)] | Total Demand [kWh/a] | Demand /m <sup>2</sup> [kWh/(m <sup>2</sup> a)] | Total Demand [kWh/a]       | Demand /m <sup>2</sup> [kWh/(m <sup>2</sup> a)] | Total Demand [kWh/a]   | Demand /m <sup>2</sup> [kWh/(m <sup>2</sup> a)] | Total Demand [kWh/a] | Demand /m <sup>2</sup> [kWh/(m <sup>2</sup> a)] | Total Demand [kWh/a]       |                    |                      |     |
|                              | Heating energy demand           | 9                                               | 51.920                     | 8                                               | 8.069                            | 14                                              | 10.014               | 14                                              | 3.856                      | 14                                              | 6.701                                 | 13                                              | 5.325                | 13                                              | 8.845                      | 3                                               | 12.544                                | 11                                              | 51.249               |                                                 |                            |                                                 |                        |                                                 |                      |                                                 |                            |                    |                      |     |
|                              | Warm water energy demand        | 13                                              | 74.996                     | 13                                              | 13.112                           | 13                                              | 9.643                | 13                                              | 3.607                      | 13                                              | 6.452                                 | 13                                              | 5.325                | 13                                              | 8.845                      | 5                                               | 20.907                                | 13                                              | 60.567               |                                                 |                            |                                                 |                        |                                                 |                      |                                                 |                            |                    |                      |     |
|                              | Cooling energy demand           | n/a                                             | n/a                        | n/a                                             | n/a                              | n/a                                             | n/a                  | n/a                                             | n/a                        | n/a                                             | n/a                                   | n/a                                             | n/a                  | n/a                                             | n/a                        | n/a                                             | n/a                                   | n/a                                             | n/a                  |                                                 |                            |                                                 |                        |                                                 |                      |                                                 |                            |                    |                      |     |
|                              | Technical systems energy demand | 5                                               | 28.845                     | 5                                               | 5.043                            | 5                                               | 3.709                | 5                                               | 1.387                      | 5                                               | 2.482                                 | 3                                               | 1.229                | 5                                               | 3.402                      | 5                                               | 20.907                                | 5                                               | 23.295               |                                                 |                            |                                                 |                        |                                                 |                      |                                                 |                            |                    |                      |     |
|                              | Power demand                    | 20                                              | 115.378                    | 20                                              | 10.172                           | 20                                              | 14.836               | 20                                              | 5.349                      | 20                                              | 9.927                                 | 20                                              | 13.608               | 20                                              | 13.608                     | 20                                              | 125.439                               | 20                                              | 93.180               |                                                 |                            |                                                 |                        |                                                 |                      |                                                 |                            |                    |                      |     |
| RESULTS FROM CURRENT EPC     | ENERGY DEMAND / SOURCE          | Source /m <sup>2</sup> [kWh/(m <sup>2</sup> a)] | BED [kWh/a]                | Source /m <sup>2</sup> [kWh/(m <sup>2</sup> a)] | BED [kWh/a]                      | Source /m <sup>2</sup> [kWh/(m <sup>2</sup> a)] | BED [kWh/a]          | Source /m <sup>2</sup> [kWh/(m <sup>2</sup> a)] | BED [kWh/a]                | Source /m <sup>2</sup> [kWh/(m <sup>2</sup> a)] | BED [kWh/a]                           | Source /m <sup>2</sup> [kWh/(m <sup>2</sup> a)] | BED [kWh/a]          | Source /m <sup>2</sup> [kWh/(m <sup>2</sup> a)] | BED [kWh/a]                | Source /m <sup>2</sup> [kWh/(m <sup>2</sup> a)] | BED [kWh/a]                           | Source /m <sup>2</sup> [kWh/(m <sup>2</sup> a)] | BED [kWh/a]          | Source /m <sup>2</sup> [kWh/(m <sup>2</sup> a)] | BED [kWh/a]                | Source /m <sup>2</sup> [kWh/(m <sup>2</sup> a)] | BED [kWh/a]            | Source /m <sup>2</sup> [kWh/(m <sup>2</sup> a)] | BED [kWh/a]          | Source /m <sup>2</sup> [kWh/(m <sup>2</sup> a)] | BED [kWh/a]                |                    |                      |     |
|                              | Electrical grid energy demand   | 25                                              | 144.223                    | 25                                              | 25.215                           | 25                                              | 18.545               | 25                                              | 6.936                      | 25                                              | 12.409                                | 23                                              | 9.420                | 25                                              | 17.010                     | 35                                              | 146.346                               | 25                                              | 116.475              |                                                 |                            |                                                 |                        |                                                 |                      |                                                 |                            |                    |                      |     |
|                              | Thermal grid energy demand      | 22                                              | 126.916                    | 21                                              | 21.181                           | 27                                              | 19.657               | 27                                              | 7.463                      | 27                                              | 13.153                                | 26                                              | 10.649               | 26                                              | 17.690                     | 38                                              | 158.890                               | 24                                              | 111.816              |                                                 |                            |                                                 |                        |                                                 |                      |                                                 |                            |                    |                      |     |
|                              | Gas grid energy demand          | n/a                                             | n/a                        | n/a                                             | n/a                              | n/a                                             | n/a                  | n/a                                             | n/a                        | n/a                                             | n/a                                   | n/a                                             | n/a                  | n/a                                             | n/a                        | n/a                                             | n/a                                   | n/a                                             | n/a                  |                                                 |                            |                                                 |                        |                                                 |                      |                                                 |                            |                    |                      |     |
|                              | Other (not grid connected)      | n/a                                             | n/a                        | n/a                                             | n/a                              | n/a                                             | n/a                  | n/a                                             | n/a                        | n/a                                             | n/a                                   | n/a                                             | n/a                  | n/a                                             | n/a                        | n/a                                             | n/a                                   | n/a                                             | n/a                  |                                                 |                            |                                                 |                        |                                                 |                      |                                                 |                            |                    |                      |     |
|                              |                                 |                                                 |                            |                                                 |                                  |                                                 |                      |                                                 |                            |                                                 |                                       |                                                 |                      |                                                 |                            |                                                 |                                       |                                                 |                      |                                                 |                            |                                                 |                        |                                                 |                      |                                                 |                            |                    |                      |     |
| INPUT DATA FOR SRI           | STORAGE TYPE                    | Capacity                                        | Efficiency                 | Loss                                            | Capacity                         | Efficiency                                      | Loss                 | Capacity                                        | Efficiency                 | Loss                                            | Capacity                              | Efficiency                                      | Loss                 | Capacity                                        | Efficiency                 | Loss                                            | Capacity                              | Efficiency                                      | Loss                 | Capacity                                        | Efficiency                 | Loss                                            | Capacity               | Efficiency                                      | Loss                 | Capacity                                        | Efficiency                 | Loss               |                      |     |
|                              |                                 | SC [kWh]                                        | η <sub>SRC</sub> [%]       | ζ <sub>c</sub> [%]                              | SC [kWh]                         | η <sub>SRC</sub> [%]                            | ζ <sub>c</sub> [%]   | SC [kWh]                                        | η <sub>SRC</sub> [%]       | ζ <sub>c</sub> [%]                              | SC [kWh]                              | η <sub>SRC</sub> [%]                            | ζ <sub>c</sub> [%]   | SC [kWh]                                        | η <sub>SRC</sub> [%]       | ζ <sub>c</sub> [%]                              | SC [kWh]                              | η <sub>SRC</sub> [%]                            | ζ <sub>c</sub> [%]   | SC [kWh]                                        | η <sub>SRC</sub> [%]       | ζ <sub>c</sub> [%]                              | SC [kWh]               | η <sub>SRC</sub> [%]                            | ζ <sub>c</sub> [%]   | SC [kWh]                                        | η <sub>SRC</sub> [%]       | ζ <sub>c</sub> [%] |                      |     |
|                              | Storage electrical              | 593                                             | 93                         | 93                                              | 0,1                              | 104                                             | 93                   | 93                                              | 0,1                        | 77                                              | 93                                    | 93                                              | 0,1                  | 29                                              | 93                         | 93                                              | 0,1                                   | 51                                              | 93                   | 93                                              | 0,1                        | 39                                              | 93                     | 93                                              | 0,1                  | 71                                              | 93                         | 93                 | 0,1                  |     |
|                              | Storage thermal                 | 1.462                                           | 90                         | 90                                              | 1                                | 264                                             | 90                   | 90                                              | 1                          | 183                                             | 90                                    | 90                                              | 1                    | 61                                              | 90                         | 90                                              | 1                                     | 162                                             | 90                   | 90                                              | 1                          | 102                                             | 90                     | 90                                              | 1                    | 183                                             | 90                         | 90                 | 1                    |     |
|                              | Storage gas                     | n/a                                             | n/a                        | n/a                                             | n/a                              | n/a                                             | n/a                  | n/a                                             | n/a                        | n/a                                             | n/a                                   | n/a                                             | n/a                  | n/a                                             | n/a                        | n/a                                             | n/a                                   | n/a                                             | n/a                  | n/a                                             | n/a                        | n/a                                             | n/a                    | n/a                                             | n/a                  | n/a                                             | n/a                        | n/a                | n/a                  |     |
|                              | STORAGE ACTIVITY                | Activity coefficient                            |                            | Time [d]                                        | Activity coefficient             |                                                 | Time [d]             | Activity coefficient                            |                            | Time [d]                                        | Activity coefficient                  |                                                 | Time [d]             | Activity coefficient                            |                            | Time [d]                                        | Activity coefficient                  |                                                 | Time [d]             | Activity coefficient                            |                            | Time [d]                                        | Activity coefficient   |                                                 | Time [d]             | Activity coefficient                            |                            | Time [d]           | Activity coefficient |     |
| Storage grid type electrical | 2                               |                                                 | 1                          | 2                                               |                                  | 1                                               | 2                    |                                                 | 1                          | 2                                               |                                       | 1                                               | 2                    |                                                 | 1                          | 2                                               |                                       | 1                                               | 2                    |                                                 | 1                          | 2                                               |                        | 1                                               | 2                    |                                                 | 1                          | 2                  |                      | 1   |
| Storage grid type thermal    | 2                               |                                                 | 1                          | 2                                               |                                  | 1                                               | 2                    |                                                 | 1                          | 2                                               |                                       | 1                                               | 2                    |                                                 | 1                          | 2                                               |                                       | 1                                               | 2                    |                                                 | 1                          | 2                                               |                        | 1                                               | 2                    |                                                 | 1                          | 2                  |                      | 1   |
| Storage grid type gas        | n/a                             |                                                 | n/a                        | n/a                                             |                                  | n/a                                             | n/a                  |                                                 | n/a                        | n/a                                             |                                       | n/a                                             | n/a                  |                                                 | n/a                        | n/a                                             |                                       | n/a                                             | n/a                  |                                                 | n/a                        | n/a                                             |                        | n/a                                             | n/a                  |                                                 | n/a                        | n/a                |                      | n/a |

## SRI CALCULATION RESULTS

[illegible]
